# Supplementary material for: A single N-terminal amino acid determines the distinct roles of histones H3 and H3.3 in the Drosophila male germline stem cell lineage
Source: PubMed Central journal article supplement (PMC10174566; doi:10.1371/journal.pbio.3002098), 2023-05-01

S1 Fig:

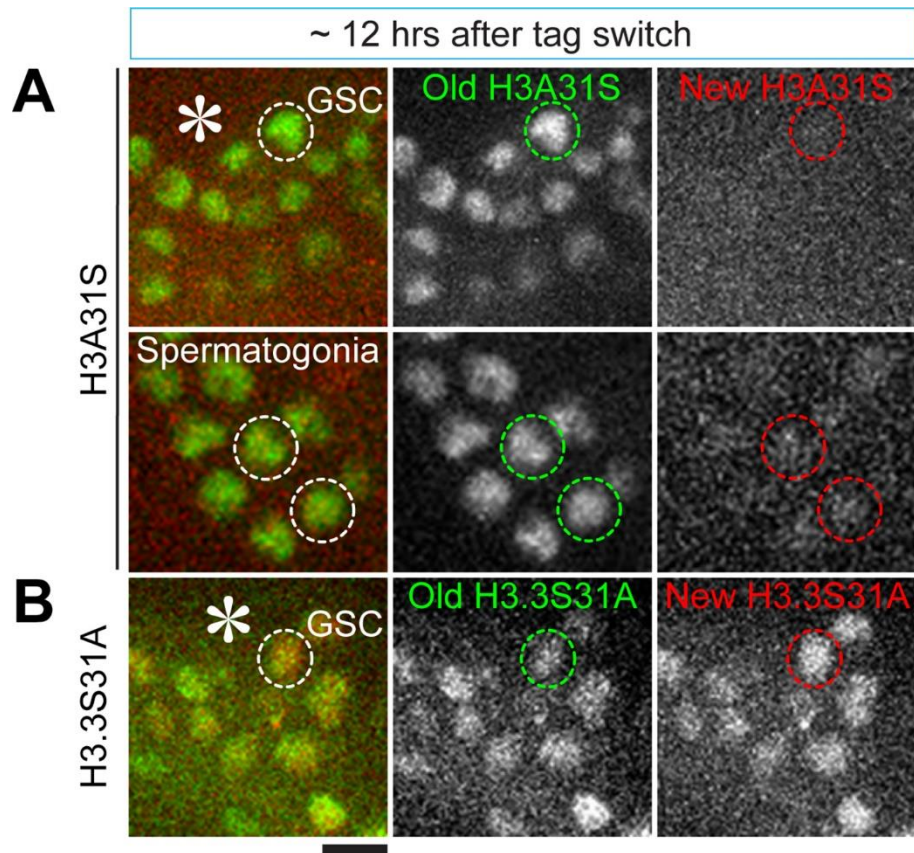

Supplement: pbio.3002098.s001.pdf [file pbio.3002098.s001.pdf]
