# Supplementary material for: A single N-terminal amino acid determines the distinct roles of histones H3 and H3.3 in the Drosophila male germline stem cell lineage
Source: PubMed Central journal article supplement (PMC10174566; doi:10.1371/journal.pbio.3002098), 2023-05-01
Supplement: pbio.3002098.s009.pdf [file pbio.3002098.s009.pdf]

**S1 Table:**

|    | Number of GSC |        | Tumor Present (N/Y) |        | Hub Size ( $\mu\text{m}^2$ ) |         |
|----|---------------|--------|---------------------|--------|------------------------------|---------|
|    | H3 WT         | H3A31S | H3 WT               | H3A31S | H3 WT                        | H3A31S  |
| 1  | 9             | 10     | N                   | Y      | 72.22                        | 154.984 |
| 2  | 7             | 10     | N                   | Y      | 72.336                       | 336.012 |
| 3  | 6             | 10     | N                   | Y      | 75.592                       | 106.833 |
| 4  | 8             | 10     | N                   | Y      | 71.522                       | 199.133 |
| 5  | 7             | 10     | N                   | Y      | 91.124                       | 243.993 |
| 6  | 9             | 10     | N                   | Y      | 61.714                       | 242.899 |
| 7  | 6             | 10     | N                   | Y      | 106.786                      | 227.034 |
| 8  | 8             | 10     | N                   | Y      | 89.574                       | 560.199 |
| 9  | 10            | 10     | N                   | Y      | 80.373                       | 331.096 |
| 10 | 7             | 10     | N                   | N      | 98.154                       | 193.89  |
| 11 | 6             | 11     | N                   | N      | 82.803                       | 687.417 |
| 12 | 8             | 12     | N                   | N      | 103.32                       | 290.353 |
| 13 | 10            | 13     | N                   | N      | 100.4332                     | 563.578 |
| 14 | 10            | 14     | N                   | N      | 115.23                       | 225.401 |
| 15 | 9             | 14     | N                   | N      | 170.32                       | 199.598 |
| 16 | 6             | 15     | N                   | N      | 80.34                        | 112.701 |
| 17 | 9             | 16     | N                   | N      | 96.324                       | 237.138 |
| 18 | 11            | 17     | N                   | N      | 98.34                        | 596.783 |
| 19 | 9             | 16     | N                   | N      | 130.3                        | 596.783 |
| 20 | 8             | 18     | N                   | N      | 93.43                        | 86.175  |
| 21 | 9             | 18     | N                   | N      | 90.2343                      | 136.415 |
| 22 | 10            | 18     | N                   | N      | 112.34                       | 207.937 |
| 23 | 8             | 19     | N                   | N      | 107.34                       | 108.388 |
| 24 | 10            | 20     | N                   | N      | 104.23                       | 81.562  |

|    |    |    |   |   |        |         |
|----|----|----|---|---|--------|---------|
| 25 | 10 | 20 | N | N | 80.32  | 119.811 |
| 26 | 10 | 21 | N | N | 85.34  | 185.957 |
| 27 | 10 | 22 | N | N | 70.23  | 103.374 |
| 28 | 10 | 22 | N | N | 88.454 | 229.801 |
| 29 | 9  | 22 | N | N | 90.234 | 108.45  |
| 30 | 8  | 18 | N | N | 89.35  | 267.98  |
