# Supplementary material for: A single N-terminal amino acid determines the distinct roles of histones H3 and H3.3 in the Drosophila male germline stem cell lineage
Source: PubMed Central journal article supplement (PMC10174566; doi:10.1371/journal.pbio.3002098), 2023-05-01
Supplement: pbio.3002098.s010.pdf [file pbio.3002098.s010.pdf]

**S2 Table:****For Fig 2B:**

|    | 1 DAY   |          | 5 DAY   |          | 10 DAY  |          |
|----|---------|----------|---------|----------|---------|----------|
|    | H3.3 WT | H3.3S31A | H3.3 WT | H3.3S31A | H3.3 WT | H3.3S31A |
| 1  | 12      | 10       | 10      | 8        | 10      | 10       |
| 2  | 10      | 10       | 12      | 8        | 9       | 9        |
| 3  | 14      | 10       | 10      | 9        | 9       | 9        |
| 4  | 13      | 10       | 12      | 10       | 9       | 9        |
| 5  | 10      | 9        | 15      | 11       | 9       | 8        |
| 6  | 10      | 10       | 13      | 7        | 9       | 8        |
| 7  | 10      | 9        | 10      | 6        | 9       | 8        |
| 8  | 10      | 10       | 8       | 9        | 10      | 7        |
| 9  | 10      | 11       | 9       | 8        | 10      | 7        |
| 10 | 9       | 12       | 10      | 10       | 8       | 7        |
| 11 | 8       | 12       | 12      | 8        | 8       | 5        |
| 12 | 9       | 10       | 13      | 9        | 8       | 5        |
| 13 | 9       | 9        | 12      | 6        | 8       | 5        |
| 14 | 9       | 11       | 15      | 7        | 11      | 5        |
| 15 | 10      | 11       | 13      | 7        | 7       | 6        |
| 16 | 10      | 11       | 10      | 7        | 7       | 6        |
| 17 | 11      | 11       | 10      | 9        | 8       | 6        |
| 18 | 11      | 12       | 10      | 10       | 8       | 7        |
| 19 | 12      | 11       | 10      | 10       | 8       | 7        |
| 20 | 14      | 12       | 11      | 10       | 10      | 7        |
| 21 | 14      | 12       | 9       | 6        | 10      | 8        |
| 22 | 10      | 10       | 10      | 10       | 10      | 8        |
| 23 | 10      | 10       | 12      | 8        |         | 8        |

|    |    |    |    |    |  |   |
|----|----|----|----|----|--|---|
| 24 | 10 | 12 | 11 | 8  |  | 9 |
| 25 | 9  | 12 | 8  | 8  |  | 9 |
| 26 | 10 | 12 | 7  | 9  |  | 9 |
| 27 | 12 | 11 | 10 | 9  |  | 9 |
| 28 | 12 | 14 | 11 | 8  |  |   |
| 29 | 10 | 9  | 8  | 10 |  |   |
| 30 | 11 | 9  | 9  | 10 |  |   |

**For Fig 2C:**

|    | H3.3 WT | H3.3S31A | H3.3 WT | H3.3S31A | H3.3 WT | H3.3S31A | H3.3 WT | H3.3S31A |
|----|---------|----------|---------|----------|---------|----------|---------|----------|
| 1  | 113     | 89       | 86      | 143      | 88      | 82       | 157     | 93       |
| 2  | 130     | 149      | 157     | 135      | 103     | 58       | 162     | 116      |
| 3  | 124     | 158      | 154     | 141      | 81      | 77       | 157     | 114      |
| 4  | 121     | 153      | 153     | 141      | 136     | 130      | 112     | 129      |
| 5  | 135     | 176      | 153     | 127      | 117     | 108      | 75      | 110      |
| 6  | 151     | 161      | 154     | 137      | 107     | 113      | 126     | 86       |
| 7  | 138     | 149      | 146     | 132      | 75      | 60       | 92      | 119      |
| 8  | 163     | 143      | 164     | 138      | 119     | 55       | 159     | 112      |
| 9  | 133     | 161      | 152     | 137      | 104     | 70       | 96      | 75       |
| 10 | 167     | 137      | 179     | 161      | 79      | 50       | 142     | 40       |
| 11 | 164     | 151      | 155     | 146      | 102     | 70       |         | 17       |
| 12 | 116     | 164      | 113     | 92       |         |          |         |          |
| 13 | 63      | 87       | 99      | 122      |         |          |         |          |
| 14 | 88      | 93       | 77      | 76       |         |          |         |          |
| 15 |         | 60       |         |          |         |          |         |          |

**For Fig 2E:**

|    | <b>H3</b> | <b>H3.3S31A</b> |
|----|-----------|-----------------|
| 1  | 59881     | 28769           |
| 2  | 78967     | 19985           |
| 3  | 32511     | 7946            |
| 4  | 56733     | 7503            |
| 5  | 163448    | 18940           |
| 6  | 132532    | 21816           |
| 7  | 66852     | 35025           |
| 8  | 50997     | 47261           |
| 9  | 64667     | 23953           |
| 10 | 136280    | 27869           |
| 11 | 187285    | -6870           |
| 12 | 135102    | 24899           |
| 13 | 188863    | 3166            |
| 14 | 54171     | 16402           |
| 15 | 48664     | 87501           |
| 16 | 44977     | 51608           |
| 17 | 47493     | 25982           |
| 18 | 40704     | 69806           |
| 19 | 55233     | 64683           |
| 20 | 76958     | 115184          |
| 21 | 143428    | 508             |
| 22 | 168891    | 13372           |
| 23 | 154756    | 40281           |
| 24 | 54936     | 51094           |
| 25 | 72554     | 21205           |

|    |        |       |
|----|--------|-------|
| 26 | 70797  | 38302 |
| 27 | 57380  | 45340 |
| 28 | 40279  | 29492 |
| 29 | 64756  | 18817 |
| 30 | 106730 | 29054 |
| 31 | 84809  | 32523 |
| 32 | 92251  | 72083 |
| 33 | 49942  | 18965 |
| 34 | 93608  | 35999 |
| 35 | 93595  | 7688  |
| 36 | 88839  | 73241 |
| 37 | 123463 | 3264  |
| 38 | 57254  | 78916 |
| 39 | 47667  | 21117 |
| 40 | 67542  | 2232  |
| 41 | 88735  | 6210  |
| 42 | 46997  | 4203  |
| 43 | 92333  | 10058 |
| 44 | 96380  | 15735 |
| 45 | 22848  | 3041  |
| 46 | 21911  | 60898 |
| 47 | 11980  | 22080 |
| 48 | 10064  | 23448 |
| 49 | 339    | 59483 |
| 50 | 9989   |       |
| 51 | 4336   |       |
| 52 | 3640   |       |

|    |       |  |
|----|-------|--|
| 53 | 11177 |  |
| 54 | 2757  |  |
