# Supplementary material for: A single N-terminal amino acid determines the distinct roles of histones H3 and H3.3 in the Drosophila male germline stem cell lineage
Source: PubMed Central journal article supplement (PMC10174566; doi:10.1371/journal.pbio.3002098), 2023-05-01
Supplement: pbio.3002098.s011.pdf [file pbio.3002098.s011.pdf]

**S3 Table:**

Quantification of histone inheritance pattern in asymmetrically dividing GSCs or symmetrically dividing SGs, which express the corresponding wild-type or mutant histones. Table showing log<sub>2</sub> ratios of the corresponding total histones between sister chromatids in telophase cells.

| #  | Old H3 (GSC) | New H3 (GSC) | Old H3 (SG) | New H3 (SG) | Old H3A31S (GSC) | New H3A31S (GSC) | Old H3.3 (GSC) | New H3.3 (GSC) | Old H3.3S31A (GSC) | New H3.3S31A (GSC) |
|----|--------------|--------------|-------------|-------------|------------------|------------------|----------------|----------------|--------------------|--------------------|
| 1  | 1.585        | 0.529        | 0.108       | 0.205       | -0.060           | -0.471           | 0.676          | 0.301          | -0.102             | 0.356              |
| 2  | 1.084        | 0.424        | 0.085       | 0.136       | 0.188            | 0.300            | 0.626          | 0.218          | 0.128              | 0.190              |
| 3  | 1.067        | 0.558        | 0.174       | 0.120       | 0.094            | 0.144            | 0.642          | 0.356          | 0.121              | 0.371              |
| 4  | 0.775        | 0.269        | 0.041       | 0.017       | 0.464            | 0.392            | 0.120          | -0.054         | 0.527              | 0.147              |
| 5  | 0.938        | 0.437        | 0.017       | 0.172       | 0.137            | 0.083            | 0.299          | 0.220          | 0.461              | 0.825              |
| 6  | 0.983        | 0.526        | 0.056       | 0.069       | 0.494            | 0.175            | -0.357         | -0.283         | 0.093              | 0.401              |
| 7  | 1.084        | 0.427        | 0.136       | 0.184       | 0.344            | 0.385            | -0.122         | -0.687         | -0.161             | 0.625              |
| 8  | 0.938        | 0.437        | 0.324       | 0.068       | 0.446            | 0.238            | 0.040          | 0.169          | 0.383              | 0.335              |
| 9  | 0.983        | 0.526        | 0.194       | 0.116       | 0.286            | -0.293           | 0.214          | 0.203          | -0.162             | -0.302             |
| 10 | 0.595        | 0.276        | 0.000       | 0.160       | 0.464            | 0.376            | 0.176          | 0.113          | 0.472              | 0.238              |
| 11 | 0.641        | 0.592        | 0.144       | 0.076       | 0.237            | -0.349           | -0.456         | -0.231         | 0.154              | 0.165              |
| 12 | 0.777        | 0.224        | 0.076       | 0.001       | 0.048            | 0.421            |                |                | 0.161              | 0.184              |
| 13 | 1.267        | 0.077        | 0.175       | 0.140       | -0.226           | -0.025           |                |                | -0.026             | -0.150             |
| 14 | 1.006        | 0.578        | 0.040       | 0.087       | 0.352            | 0.229            |                |                | -0.240             | 0.027              |
| 15 | 1.395        | 0.561        | 0.019       | 0.213       | -0.376           | -0.184           |                |                |                    |                    |
| 16 | 1.019        | 0.135        | 0.060       | 0.072       |                  |                  |                |                |                    |                    |
| 17 | 1.067        | 0.742        | 0.147       | 0.069       |                  |                  |                |                |                    |                    |
| 18 | 0.775        | 0.269        | 0.047       | 0.080       |                  |                  |                |                |                    |                    |
| 19 | 0.889        | 0.006        | 0.103       | 0.203       |                  |                  |                |                |                    |                    |
| 20 | 0.684        | 0.522        | 0.241       | 0.188       |                  |                  |                |                |                    |                    |
| 21 | 0.891        | 0.754        | 0.229       | 0.267       |                  |                  |                |                |                    |                    |
| 22 | 1.148        | 0.333        | 0.187       | 0.239       |                  |                  |                |                |                    |                    |

|    |       |        |       |       |  |  |  |  |  |  |
|----|-------|--------|-------|-------|--|--|--|--|--|--|
| 23 | 0.802 | -0.155 | 0.229 | 0.141 |  |  |  |  |  |  |
| 24 | 1.165 | 0.435  | 0.219 | 0.171 |  |  |  |  |  |  |
| 25 | 1.104 | -0.003 | 0.241 | 0.188 |  |  |  |  |  |  |
| 26 | 0.614 | -0.309 | 0.515 | 0.025 |  |  |  |  |  |  |
| 27 | 0.236 | 0.048  | 0.384 | 0.496 |  |  |  |  |  |  |
| 28 | 0.264 | -0.075 | 0.619 | 0.375 |  |  |  |  |  |  |
| 29 | 0.421 | 0.039  |       |       |  |  |  |  |  |  |
