# Supplementary material for: A single N-terminal amino acid determines the distinct roles of histones H3 and H3.3 in the Drosophila male germline stem cell lineage
Source: PubMed Central journal article supplement (PMC10174566; doi:10.1371/journal.pbio.3002098), 2023-05-01
Supplement: pbio.3002098.s012.pdf [file pbio.3002098.s012.pdf]

**S4 Table:**

|    | <b>H3</b> | <b>H3A31S</b> | <b>H3.3</b> | <b>H3.3S31A</b> |
|----|-----------|---------------|-------------|-----------------|
| 1  | 0.505003  | 0.6234234     | 0.7142018   | 0.5588644       |
| 2  | 0.4652818 | 0.6324234     | 0.7142018   | 0.5682859       |
| 3  | 0.505003  | 0.456535      | 0.6414944   | 0.7142018       |
| 4  | 0.3078724 | 0.4123425     | 0.6367248   | 0.5420177       |
| 5  | 0.2699318 | 0.4346435     | 0.6737306   | 0.4756581       |
| 6  | 0.6457511 | 0.5567548     | 0.6603306   | 0.5732267       |
| 7  | 0.205099  | 0.5634624     | 0.8052035   | 0.623414        |
| 8  | 0.6373971 | 0.5654345     | 0.8331215   | 0.823421        |
| 9  | 0.5792014 | 0.5653452     | 0.8393985   | 0.5383276       |
| 10 | 0.5580345 | 0.6657467     | 0.8393985   | 0.5836723       |
| 11 | 0.676327  | 0.6342342     | 0.934834    | 0.625632        |
| 12 | 0.4770097 | 0.4234242     | 0.8623843   | 0.512134        |
| 13 | 0.3923489 | 0.4232433     | 0.962432    | 0.489232        |
| 14 | 0.645301  | 0.4435346     | 0.532423    | 0.7232244       |
| 15 | 0.6277997 | 0.5324234     | 0.6352837   | 0.528932        |
| 16 | 0.4751919 | 0.5234234     | 0.4576943   | 0.4857843       |
| 17 | 0.4662648 | 0.5342342     | 0.632983    | 0.6389328       |
| 18 | 0.3042862 | 0.5342342     | 0.7094834   | 0.5484387       |
| 19 | 0.5895384 | 0.6           | 0.8238238   | 0.6498438       |
| 20 | 0.6673401 | 0.6324234     | 0.539242    | 0.6398894       |
| 21 | 0.3457425 | 0.6345234     | 0.683822    | 0.7478438       |
| 22 | 0.393957  | 0.3123123     | 0.7948923   | 0.8478438       |
| 23 | 0.4056038 | 0.3435346     | 0.832378    | 0.6487433       |
| 24 | 0.4249862 | 0.5435345     | 0.9327833   | 0.5093289       |
| 25 | 0.4323314 | 0.5342343     | 0.8367124   | 0.612332        |

|    |           |           |           |           |
|----|-----------|-----------|-----------|-----------|
| 26 | 0.4937092 | 0.5324234 | 0.7276237 | 0.7326723 |
| 27 | 0.4723083 | 0.7895    | 0.439823  | 0.5378213 |
| 28 | 0.5664577 | 0.7351432 | 0.5309289 | 0.6348943 |
| 29 | 0.6446252 | 0.7513251 | 0.6398478 | 0.5328932 |
| 30 | 0.5344189 | 0.7514362 | 0.7478439 | 0.598478  |
| 31 | 0.5210149 | 0.735431  |           |           |
| 32 | 0.5236257 | 0.6231351 |           |           |
| 33 | 0.3454889 | 0.6587441 |           |           |
| 34 | 0.4435689 | 0.6541122 |           |           |
| 35 | 0.514042  |           |           |           |
| 36 | 0.2873534 |           |           |           |
| 37 | 0.3698455 |           |           |           |
| 38 | 0.5764542 |           |           |           |
| 39 | 0.3808914 |           |           |           |
| 40 | 0.6064319 |           |           |           |
| 41 | 0.5845584 |           |           |           |
| 42 | 0.6333473 |           |           |           |
| 43 | 0.5747869 |           |           |           |
| 44 | 0.6112202 |           |           |           |
| 45 | 0.1298327 |           |           |           |
| 46 | 0.4126256 |           |           |           |
| 47 | 0.2777169 |           |           |           |
| 48 | 0.3379395 |           |           |           |
| 49 | 0.4767095 |           |           |           |
| 50 | 0.3938842 |           |           |           |
| 51 | 0.5632984 |           |           |           |
| 52 | 0.4171914 |           |           |           |
