# Supplementary material for: A single N-terminal amino acid determines the distinct roles of histones H3 and H3.3 in the Drosophila male germline stem cell lineage
Source: PubMed Central journal article supplement (PMC10174566; doi:10.1371/journal.pbio.3002098), 2023-05-01
Supplement: pbio.3002098.s013.pdf [file pbio.3002098.s013.pdf]

**S5 Table:**

|    | <b>H3K27me3</b> |               | <b>H4K20me3</b> |               |
|----|-----------------|---------------|-----------------|---------------|
|    | <b>H3 WT</b>    | <b>H3A31S</b> | <b>H3 WT</b>    | <b>H3A31S</b> |
| 1  | 1.78231818      | 1.003287      | 1.5698695       | 2.82295283    |
| 2  | 2.30611039      | 1.0038244     | 2.8875211       | 1.09981996    |
| 3  | 1.04781295      | 1.0038737     | 1.45446453      | 1.88535789    |
| 4  | 4.54749593      | 1.008937      | 2.96744882      | 1.20878192    |
| 5  | 1.51152774      | 1.0098271     | 4.22501681      | 2.15315126    |
| 6  | 2.3629232       | 1.013489      | 1.00953079      | 1.03679741    |
| 7  | 4.40181046      | 1.0167346     | 1.5560023       | 1.73120322    |
| 8  | 2.84736067      | 1.018232      | 1.92253776      | 1.03956375    |
| 9  | 2.98564541      | 1.018328      | 1.1131251       | 1.14419054    |
| 10 | 1.62566522      | 1.01893       | 3.40767437      | 1.58339691    |
| 11 | 1.64775363      | 1.0189348     | 1.80748225      | 1.29192066    |
| 12 | 1.3577281       | 1.0189823     | 1.30595238      | 1.03713       |
| 13 | 1.03939127      | 1.0198347     | 1.77630778      | 1.55950026    |
| 14 | 1.89772195      | 1.0268947     | 1.37608868      | 1.30224882    |
| 15 | 1.54647574      | 1.0283783     | 1.38984057      | 1.32723822    |
| 16 | 1.82828518      | 1.0284378     | 1.15512891      | 1.03686739    |
| 17 | 1.37648763      | 1.0284378     | 1.93292301      | 1.16063649    |
| 18 | 3.63357807      | 1.02874       |                 | 2.12998551    |
| 19 | 2.06851693      | 1.0378347     |                 | 1.06175943    |
| 20 | 1.08682106      | 1.03823       |                 | 1.1322978     |
| 21 | 1.88809093      | 1.047372      |                 |               |
| 22 | 4.87522781      | 1.048923      |                 |               |
| 23 | 1.19049149      | 1.0489238     |                 |               |
| 24 | 7.22520586      | 1.0928732     |                 |               |
| 25 | 1.32017942      | 1.123453      |                 |               |
| 26 | 4.58812042      | 1.1732984     |                 |               |
| 27 | 2.68466793      | 1.1938478     |                 |               |
| 28 |                 | 1.272763      |                 |               |
| 29 |                 | 1.328948      |                 |               |
| 30 |                 | 1.3828387     |                 |               |
| 31 |                 | 1.421878      |                 |               |
| 32 |                 | 1.4621872     |                 |               |
| 33 |                 | 1.8273467     |                 |               |
| 34 |                 | 2.000726      |                 |               |
| 35 |                 | 2.00383       |                 |               |

|    |  |           |  |  |
|----|--|-----------|--|--|
| 36 |  | 2.0128348 |  |  |
| 37 |  | 2.0354452 |  |  |
| 38 |  | 2.234231  |  |  |
| 39 |  | 2.397823  |  |  |
| 40 |  | 2.589237  |  |  |
| 41 |  | 2.6238236 |  |  |
| 42 |  | 2.888937  |  |  |
| 43 |  | 2.9237832 |  |  |
| 44 |  | 3.0421893 |  |  |
| 45 |  | 3.1783287 |  |  |
| 46 |  | 3.4988987 |  |  |
| 47 |  | 4.8214528 |  |  |
| 48 |  | 4.924126  |  |  |
| 49 |  | 4.993727  |  |  |
| 50 |  | 5.213347  |  |  |
