# Supplementary material for: A single N-terminal amino acid determines the distinct roles of histones H3 and H3.3 in the Drosophila male germline stem cell lineage
Source: PubMed Central journal article supplement (PMC10174566; doi:10.1371/journal.pbio.3002098), 2023-05-01
Supplement: pbio.3002098.s014.pdf [file pbio.3002098.s014.pdf]

**S6 Table:**

| 1  | H3.3 WT old signal |          |          | H3.3S31A old signal |          |          |
|----|--------------------|----------|----------|---------------------|----------|----------|
|    | 12 hr              | 24 hr    | 36 hr    | 12 hr               | 24 hr    | 36 hr    |
| 2  | 47.73618           | 24.84284 | 0.945114 | 14.48159            | 1.671011 | 0.720246 |
| 3  | 58.83411           | 17.23737 | -0.01178 | 34.78527            | 1.282397 | 0.535595 |
| 4  | 38.23234           | 21.8951  | 0.247898 | 5.735546            | 0.547177 | 0.614484 |
| 5  | 34.02596           | 24.98505 | 2.550097 | 13.7881             | 0.990151 | 0.480484 |
| 6  | 26.62867           | 31.4063  | 2.674008 | 20.23622            | 1.501602 | 0.40571  |
| 7  | 38.89192           | 35.60371 | 2.187838 | 15.72423            | 0.401045 | 0.66013  |
| 8  | 38.04328           | 23.92922 | 5.36276  | 7.634003            | 0.334584 | 0.750244 |
| 9  | 49.57918           | 30.70699 | 5.924892 | 6.645663            | 0.474563 | 0.653651 |
| 10 | 47.1264            | 21.54344 | 3.825965 | 17.4165             | 0.138986 | 0.35898  |
| 11 | 42.67001           | 37.18892 | 2.318617 | 11.3745             | 3.922642 | 0.70151  |
| 12 | 48.234156          | 30.35239 | 0.117078 | 17.33183            | 0.249106 | 0.676636 |
| 13 | 39.285729          | 18.4424  | -0.01056 | 11.4594             | 0.442394 | 0.658495 |
| 14 | 42.493486          | 20.92496 | -0.34764 | 17.9079             | 0.246283 |          |
| 15 |                    |          | 2.14072  | 16.26656            | 0.256792 |          |
| 16 |                    |          | 1.452075 |                     | 0.502443 |          |
| 17 |                    |          | 0.780869 |                     |          |          |
| 18 |                    |          | 0.756709 |                     |          |          |
|    |                    |          | 1.237075 |                     |          |          |
