# Supplementary material for: A single N-terminal amino acid determines the distinct roles of histones H3 and H3.3 in the Drosophila male germline stem cell lineage
Source: PubMed Central journal article supplement (PMC10174566; doi:10.1371/journal.pbio.3002098), 2023-05-01
Supplement: pbio.3002098.s015.pdf [file pbio.3002098.s015.pdf]

**S7 Table:**

|                                              | <b>H3</b> | <b>H3A31S</b> | <b>H3.3</b> | <b>H3.3S31A</b> |
|----------------------------------------------|-----------|---------------|-------------|-----------------|
| Promoter and TSS                             | 0.470     | 0.000         | 0.805       | 0.969           |
| Transcription elongation                     | 0.683     | 0.999         | 0.836       | 0.935           |
| Regulatory regions (enhancers)               | 0.930     | 0.780         | 0.953       | 0.612           |
| Active introns                               | 0.359     | 0.949         | 0.387       | 0.345           |
| Active gene on the Male X                    | 0.367     | 0.219         | 0.589       | 0.042           |
| Polycomb-mediated repression                 | 0.776     | 0.950         | 0.006       | 0.184           |
| Pericentromeric heterochromatin              | 0.000     | 0.236         | 0.000       | 0.012           |
| Heterochromatin-like embedded in euchromatin | 0.094     | 0.930         | 0.101       | 0.928           |
| Transcriptionally silent, intergenic         | 0.774     | 1.000         | 0.687       | 0.031           |
