# Supplementary material for: A single N-terminal amino acid determines the distinct roles of histones H3 and H3.3 in the Drosophila male germline stem cell lineage
Source: PubMed Central journal article supplement (PMC10174566; doi:10.1371/journal.pbio.3002098), 2023-05-01
Supplement: pbio.3002098.s016.pdf [file pbio.3002098.s016.pdf]

**S8 Table:**

|    | <b>WT H3 SG</b> | <b>WT H3 GSC</b> |
|----|-----------------|------------------|
| 1  | 0.738           | 0.505003         |
| 2  | 0.673467        | 0.465282         |
| 3  | 0.484           | 0.505003         |
| 4  | 0.84743         | 0.307872         |
| 5  | 0.732782        | 0.269932         |
| 6  | 0.5636          | 0.645751         |
| 7  | 0.63256         | 0.205099         |
| 8  | 0.784578        | 0.637397         |
| 9  | 0.7256          | 0.579201         |
| 10 | 0.6256          | 0.558035         |
| 11 | 0.897           | 0.676327         |
| 12 | 0.478578        | 0.47701          |
| 13 | 0.57223         | 0.392349         |
| 14 | 0.58734         | 0.645301         |
| 15 | 0.73273         | 0.6278           |
| 16 | 0.63287         | 0.475192         |
| 17 | 0.73287         | 0.466265         |
| 18 | 0.7389          | 0.304286         |
| 19 | 0.43287         | 0.589538         |
| 20 | 0.8287          | 0.66734          |
| 21 |                 | 0.345743         |
| 22 |                 | 0.393957         |
| 23 |                 | 0.405604         |
| 24 |                 | 0.424986         |
| 25 |                 | 0.432331         |
| 26 |                 | 0.493709         |
| 27 |                 | 0.472308         |
| 28 |                 | 0.566458         |
| 29 |                 | 0.644625         |
| 30 |                 | 0.534419         |
| 31 |                 | 0.521015         |
| 32 |                 | 0.523626         |
| 33 |                 | 0.345489         |
| 34 |                 | 0.443569         |
| 35 |                 | 0.514042         |
| 36 |                 | 0.287353         |

|    |  |          |
|----|--|----------|
| 37 |  | 0.369846 |
| 38 |  | 0.576454 |
| 39 |  | 0.380891 |
| 40 |  | 0.606432 |
| 41 |  | 0.584558 |
| 42 |  | 0.633347 |
| 43 |  | 0.574787 |
| 44 |  | 0.61122  |
| 45 |  | 0.129833 |
| 46 |  | 0.412626 |
| 47 |  | 0.277717 |
| 48 |  | 0.33794  |
| 49 |  | 0.47671  |
| 50 |  | 0.393884 |
| 51 |  | 0.563298 |
| 52 |  | 0.417191 |
