# Supplementary material for: A single N-terminal amino acid determines the distinct roles of histones H3 and H3.3 in the Drosophila male germline stem cell lineage
Source: PubMed Central journal article supplement (PMC10174566; doi:10.1371/journal.pbio.3002098), 2023-05-01
Supplement: pbio.3002098.s017.pdf [file pbio.3002098.s017.pdf]

**S9 Table:**

|    | <b>H3 WT</b> | <b>H3A31S</b> |
|----|--------------|---------------|
| 1  | -0.4478596   | 0.406708726   |
| 2  | -0.924558112 | 1.117425832   |
| 3  | -1.198680742 | -0.723181046  |
| 4  | 0.990116984  | -0.50036942   |
| 5  | 0.655686219  | 0.031450425   |
| 6  | -1.986923903 | -0.602375231  |
| 7  | 0.353342526  | -0.193902611  |
| 8  | 0.4027792    | -0.299776201  |
| 9  | -0.325793034 | -0.045783389  |
| 10 | 0.010714577  | -0.21484731   |
| 11 | 0.111028617  | 0.183169015   |
| 12 | -0.166668662 | -0.268065661  |
| 13 | -0.058604978 | -0.035421169  |
| 14 | 0.416207966  | -0.661338624  |
| 15 | 0.227022941  | -0.496603782  |
| 16 | -0.731326001 | -0.760416624  |
| 17 | 0.357600768  | -0.325258945  |
| 18 |              | 0.076361316   |
| 19 |              | -0.045195113  |
| 20 |              | 0.026605742   |
