# Supplementary material for: A single N-terminal amino acid determines the distinct roles of histones H3 and H3.3 in the Drosophila male germline stem cell lineage
Source: PubMed Central journal article supplement (PMC10174566; doi:10.1371/journal.pbio.3002098), 2023-05-01
Supplement: pbio.3002098.s024.pdf [file pbio.3002098.s024.pdf]

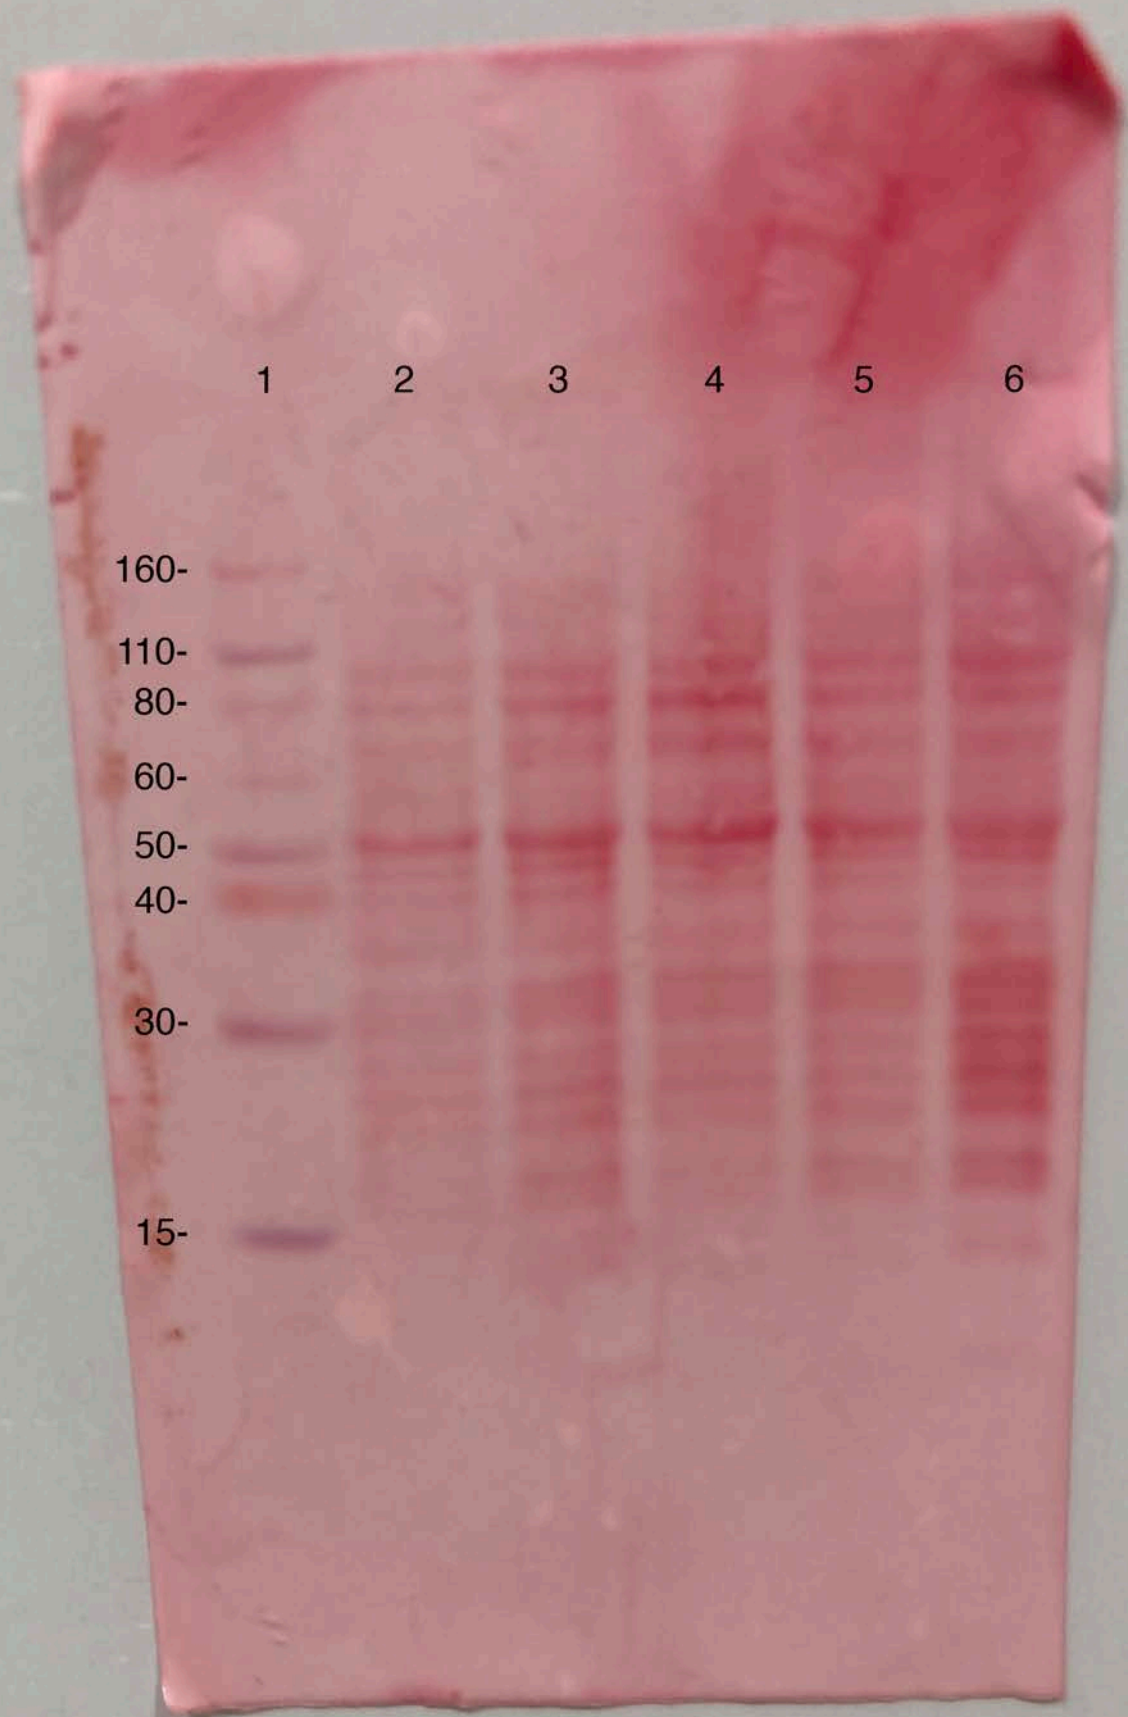

- 1: Ladder
- 2: Nos > Upd (control)
- 3: Nos > Upd, H3-eGFP
- 4: Nos > Upd, H3A31S-eGFP
- 5: Nos > Upd, H3.3-eGFP
- 6: Nos > Upd, H3.3S31A-eGFP

Ponceau staining of blot used for H3 and GFP western blots  
Corresponding to Figure S7, panel 1  
All lanes loaded with 5 pairs of Nanos-driven Unpaired (Upd) testis tumors  
Image acquired using iPhone

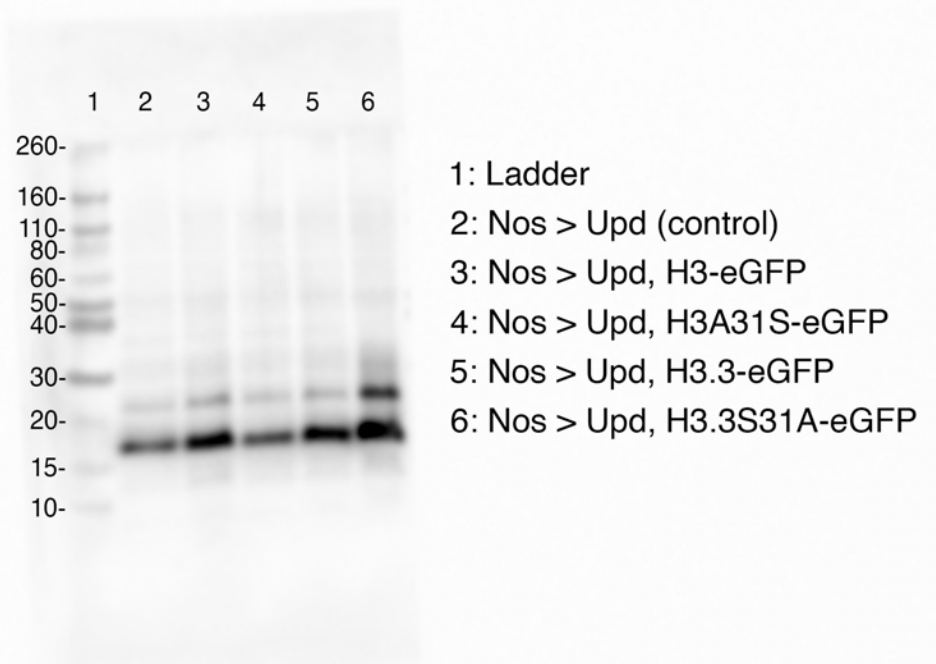

anti-Histone H3 western blot

Corresponding to Figure S7, panel 2

All lanes loaded with 5 pairs of Nanos-driven Unpaired (Upd) testis tumors

Image acquired using Chemi rapid mode on Syngene G:Box XRQ

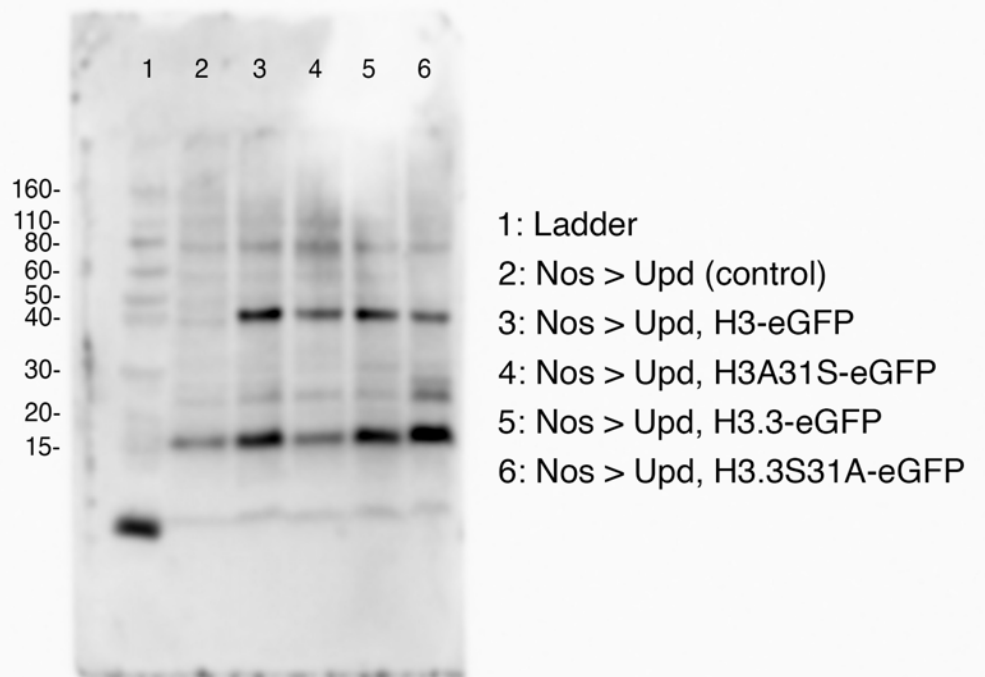

anti-GFP western blot

Corresponding to Figure S7, panel 3

All lanes loaded with 5 pairs of Nanos-driven Unpaired (Upd) testis tumors

Image acquired using Chemi rapid mode on Syngene G:Box XRQ

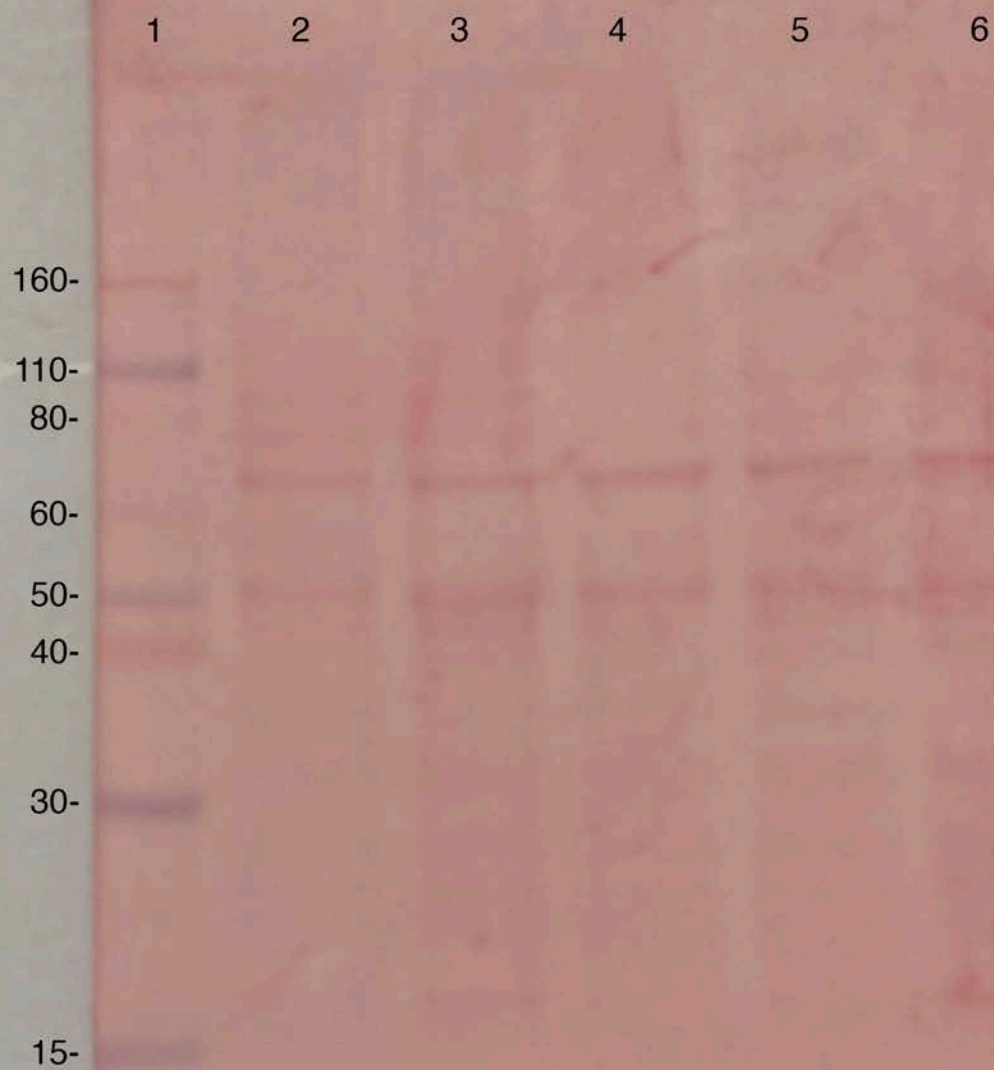

- 1: Ladder
- 2: Nos > Upd (control)
- 3: Nos > Upd, H3-eGFP
- 4: Nos > Upd, H3A31S-eGFP
- 5: Nos > Upd, H3.3-eGFP
- 6: Nos > Upd, H3.3S31A-eGFP

Ponceau staining of blot used for H3.3 western blot

Corresponding to Figure S7, panel 4

All lanes loaded with 5 pairs of Nanos-driven Unpaired (Upd) testis tumors

Image acquired using iPhone

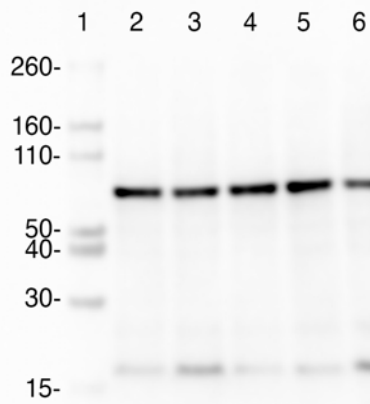

- 1: Ladder
- 2: Nos > Upd (control)
- 3: Nos > Upd, H3-eGFP
- 4: Nos > Upd, H3A31S-eGFP
- 5: Nos > Upd, H3.3-eGFP
- 6: Nos > Upd, H3.3S31A-eGFP

anti-Histone H3.3 western blot  
Corresponding to Figure S7, panel 5  
All lanes loaded with 5 pairs of Nanos-driven Unpaired (Upd) testis tumors  
Image acquired using Chemi rapid mode on Syngene G:Box XRQ
